# Supplementary material for: New Arylethanolimidazole Derivatives as HO-1 Inhibitors with Cytotoxicity against MCF-7 Breast Cancer Cells
Source: PubMed Central journal article supplement (PMC7139504; doi:10.3390/ijms21061923), 2020-03-11
Supplement: ijms-21-01923-s001.pdf [file ijms-21-01923-s001.pdf]

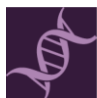

Supplementary Material

# New arylethanolimidazole derivatives as HO-1 inhibitors with cytotoxicity against MCF-7 breast cancer cells

Valeria Ciaffaglione <sup>1</sup>, Sebastiano Intagliata <sup>1,\*</sup>, Valeria Pittalà <sup>1</sup>, Agostino Marrazzo <sup>1</sup>, Valeria Sorrenti <sup>1</sup>, Luca Vanella <sup>1</sup> Antonio Rescifina <sup>1,2</sup>, Giuseppe Floresta <sup>1,3</sup>, Ameera Sultan <sup>4</sup>, Khaled Greish <sup>4</sup>, and Loredana Salerno <sup>1,\*</sup>

<sup>1</sup> Department of Drug Sciences, University of Catania, viale A. Doria 6, 95125, Catania, Italy; valeria.ciaffaglione@phd.unict.it (V.C.); s.intagliata@unict.it (S.I.); vpittala@unict.it (V.P.); marrazzo@unict.it (A.M.); sorrenti@unict.it (V.S.); lvanella@unict.it (L.V.); arescifina@unict.it (A.R.); giuseppe.floresta@unict.it (G.F.); l.salerno@unict.it (L.S.)

<sup>2</sup> Consorzio Interuniversitario Nazionale di ricerca in Metodologie e Processi Innovativi di Sintesi (C.I.N.M.P.S.), Via E. Orabona, 4, 70125 Bari, Italy

<sup>3</sup> Institute of Pharmaceutical Science, King's College London, Stamford Street, London SE1 9NH, UK

<sup>4</sup> Department of Molecular Medicine, College of Medicine and Medical Sciences, Princess Al-Jawhara Centre for Molecular Medicine, Arabian Gulf University, Manama, Kingdom of Bahrain; ameeraa@agu.edu.bh (A.S.); khaledfg@agu.edu.bh (K.G.)

\* Correspondence: s.intagliata@unict.it (S.I.); l.salerno@unict.it (L.S.); Tel.: +39-095-738-4053 (S.I.); +39-095-738-4266 (L.S.)

## Table of contents

|                                                                                                                               |         |
|-------------------------------------------------------------------------------------------------------------------------------|---------|
| Table S1: Elemental analysis data for compounds <b>2a–c</b> , <b>5a–f</b> , and <b>6a,b</b> .                                 | S2      |
| Figures S1–S22: <sup>1</sup> H NMR and <sup>13</sup> C NMR spectra of compounds <b>2a–c</b> , <b>5a–f</b> , and <b>6a,b</b> . | S3–S13  |
| Figures S23–S25: Binding mode of compounds <b>2a–c</b> , <b>5a–f</b> , and <b>6a,b</b> .                                      | S14–S15 |
| Figures S26–S36: 2D interactions of compounds <b>2a–c</b> , <b>5a–f</b> , and <b>6a,b</b> .                                   | S15–S20 |

**Table S1.** Elemental analysis data for compounds **2a–c**, **5a–f**, and **6a,b**.

| Compd     | Formula                                                            | Mw     | Calcd |      |       | Found |      |       |
|-----------|--------------------------------------------------------------------|--------|-------|------|-------|-------|------|-------|
|           |                                                                    |        | C     | H    | N     | C     | H    | N     |
| <b>2a</b> | C <sub>11</sub> H <sub>11</sub> BrN <sub>2</sub>                   | 251.12 | 52.61 | 4.42 | 11.16 | 52.69 | 4.48 | 11.19 |
| <b>2b</b> | C <sub>18</sub> H <sub>17</sub> BrN <sub>2</sub> O <sub>2</sub>    | 357.24 | 60.52 | 4.80 | 7.84  | 60.48 | 4.86 | 7.80  |
| <b>2c</b> | C <sub>17</sub> H <sub>16</sub> N <sub>2</sub>                     | 248.32 | 82.22 | 6.49 | 11.28 | 82.25 | 6.54 | 11.33 |
| <b>5a</b> | C <sub>18</sub> H <sub>17</sub> BrN <sub>2</sub> O <sub>2</sub>    | 373.24 | 57.92 | 4.59 | 7.51  | 57.95 | 4.62 | 7.55  |
| <b>5b</b> | C <sub>18</sub> H <sub>17</sub> BrN <sub>2</sub> O <sub>2</sub>    | 373.24 | 57.92 | 4.59 | 7.51  | 57.89 | 4.64 | 7.53  |
| <b>5c</b> | C <sub>18</sub> H <sub>17</sub> BrN <sub>2</sub> O <sub>2</sub>    | 373.24 | 57.92 | 4.59 | 7.51  | 57.96 | 4.64 | 7.56  |
| <b>5d</b> | C <sub>18</sub> H <sub>17</sub> BrN <sub>2</sub> O <sub>2</sub>    | 373.24 | 57.92 | 4.59 | 7.51  | 57.94 | 4.63 | 7.49  |
| <b>5e</b> | C <sub>18</sub> H <sub>17</sub> BrN <sub>2</sub> O <sub>2</sub>    | 373.24 | 57.92 | 4.59 | 7.51  | 57.96 | 4.57 | 7.53  |
| <b>5f</b> | C <sub>18</sub> H <sub>17</sub> BrN <sub>2</sub> O <sub>2</sub>    | 373.24 | 57.92 | 4.59 | 7.51  | 57.94 | 4.61 | 7.48  |
| <b>6a</b> | C <sub>18</sub> H <sub>16</sub> BrClN <sub>2</sub> O               | 391.69 | 55.19 | 4.12 | 7.15  | 55.17 | 4.10 | 7.19  |
| <b>6b</b> | C <sub>18</sub> H <sub>15</sub> BrCl <sub>2</sub> N <sub>2</sub> O | 426.13 | 50.73 | 3.55 | 6.57  | 50.77 | 3.59 | 6.53  |

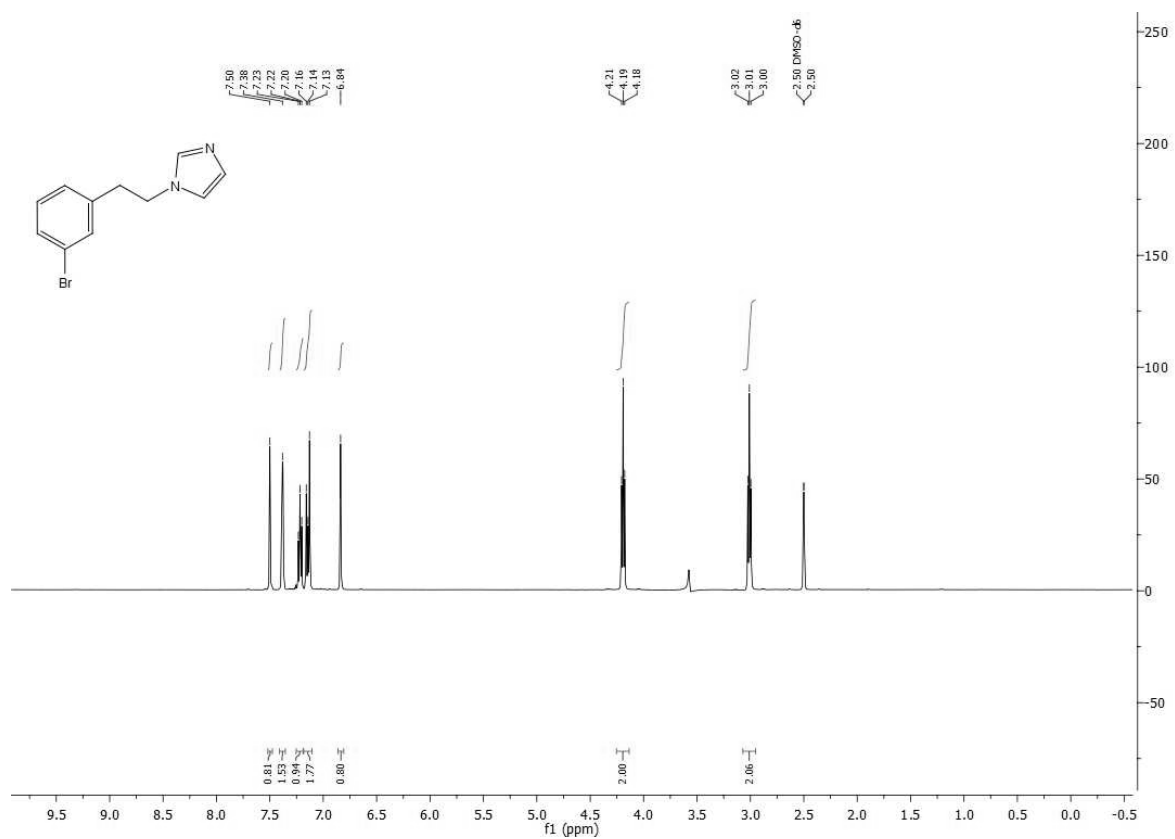

Figure S1.  $^1\text{H}$  NMR of compound 2a.

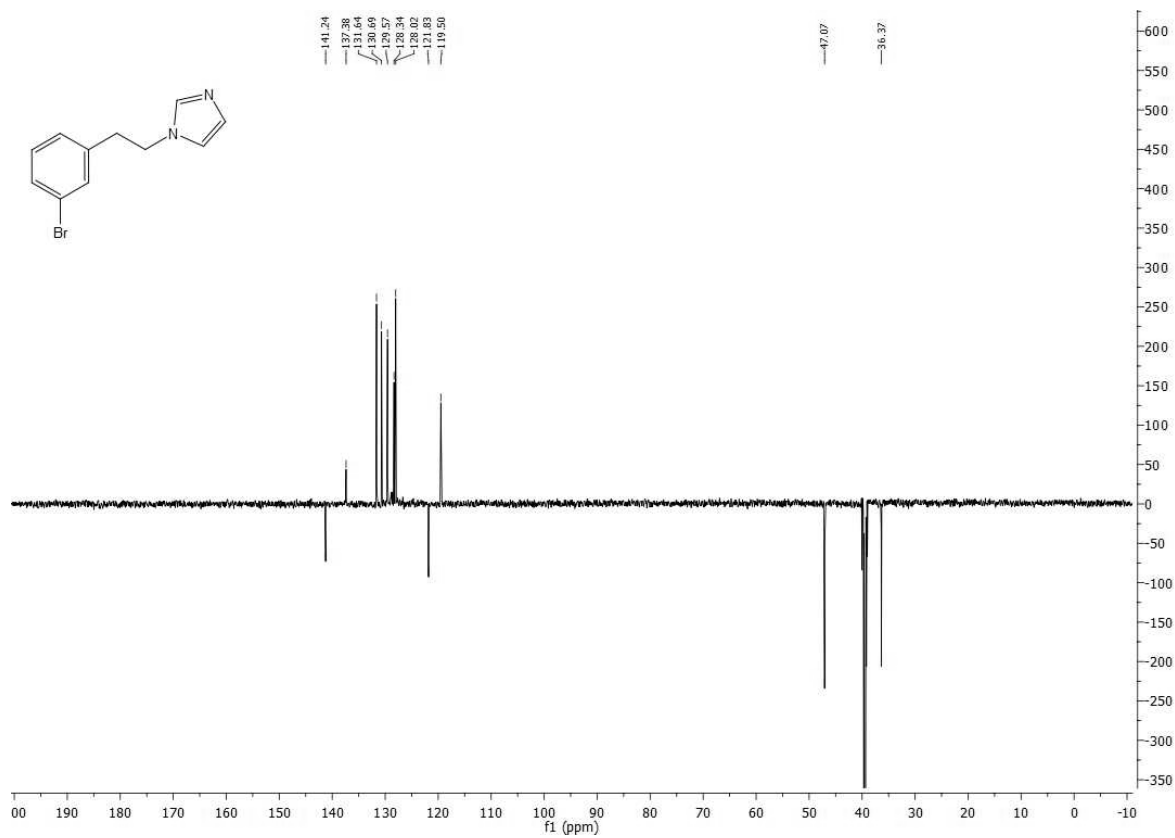

Figure S2.  $^{13}\text{C}$  NMR of compound 2a.

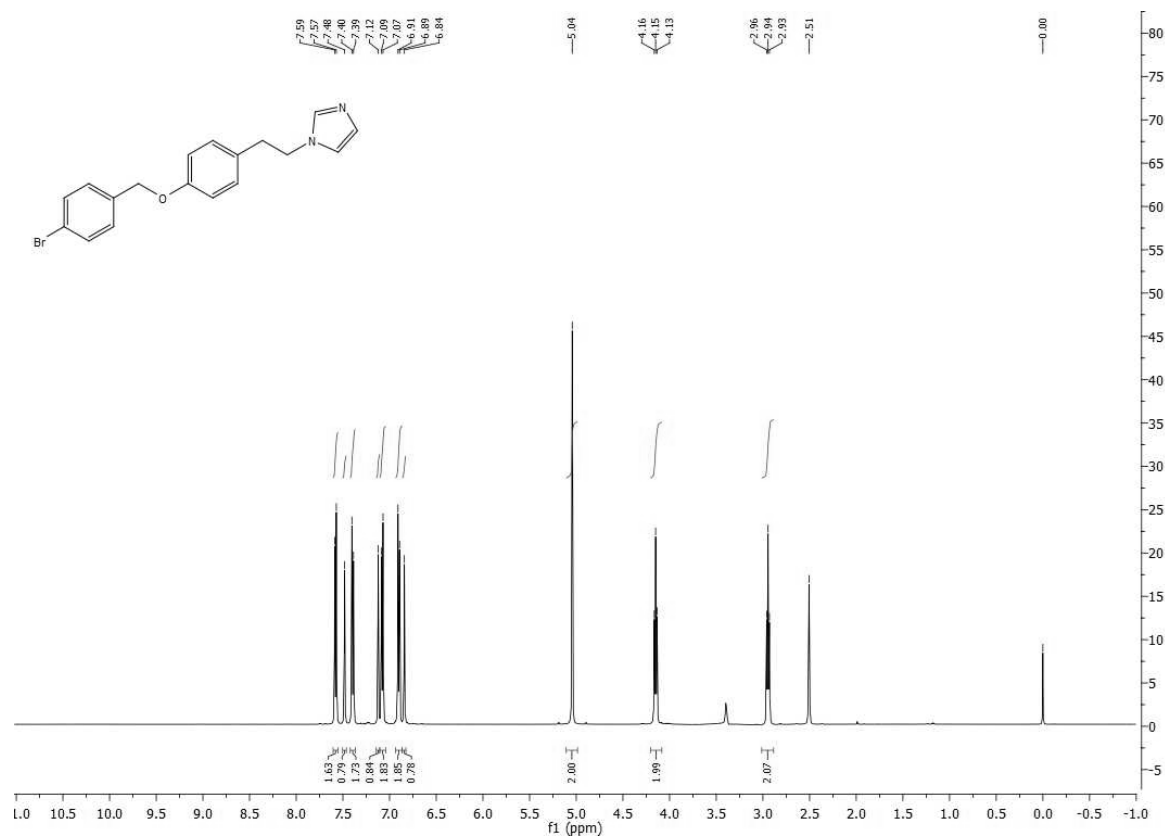Figure S3. <sup>1</sup>H NMR of compound 2b.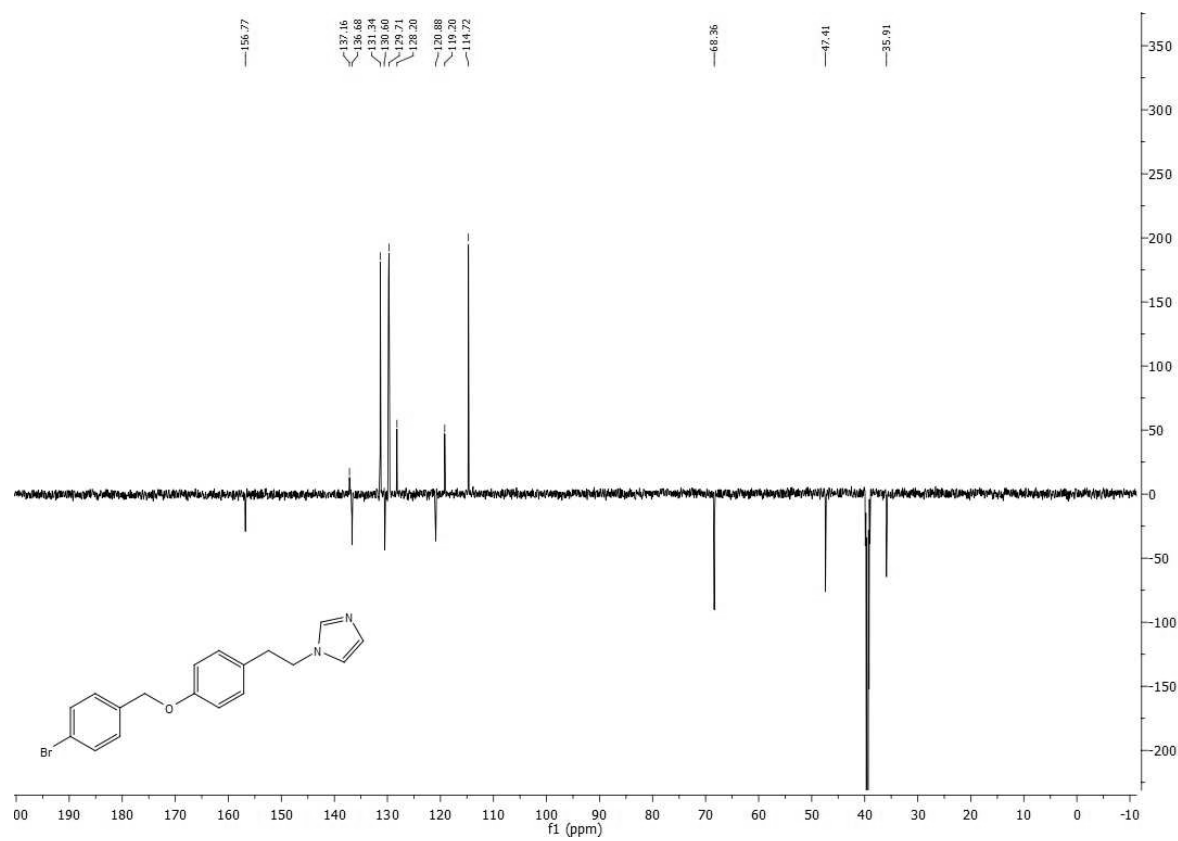Figure S4. <sup>13</sup>C NMR of compound 2b.

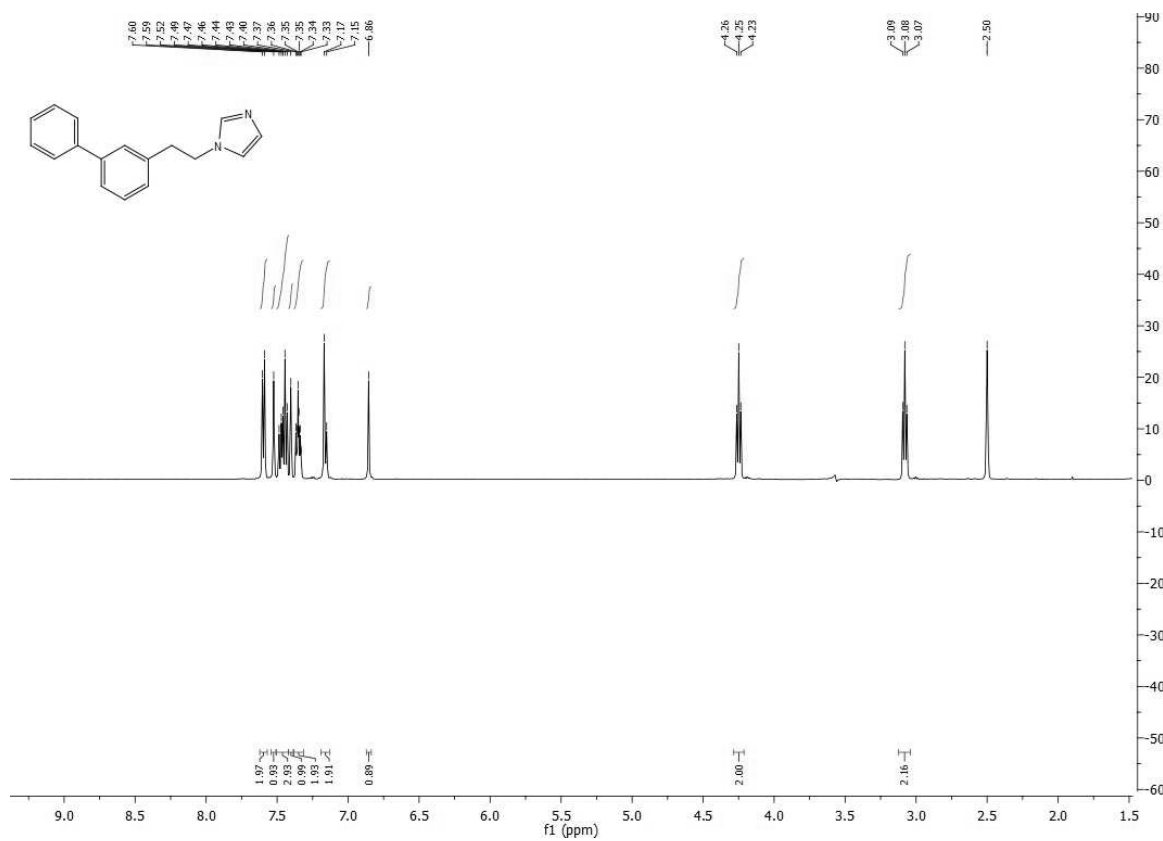Figure S5. <sup>1</sup>H NMR of compound 2c.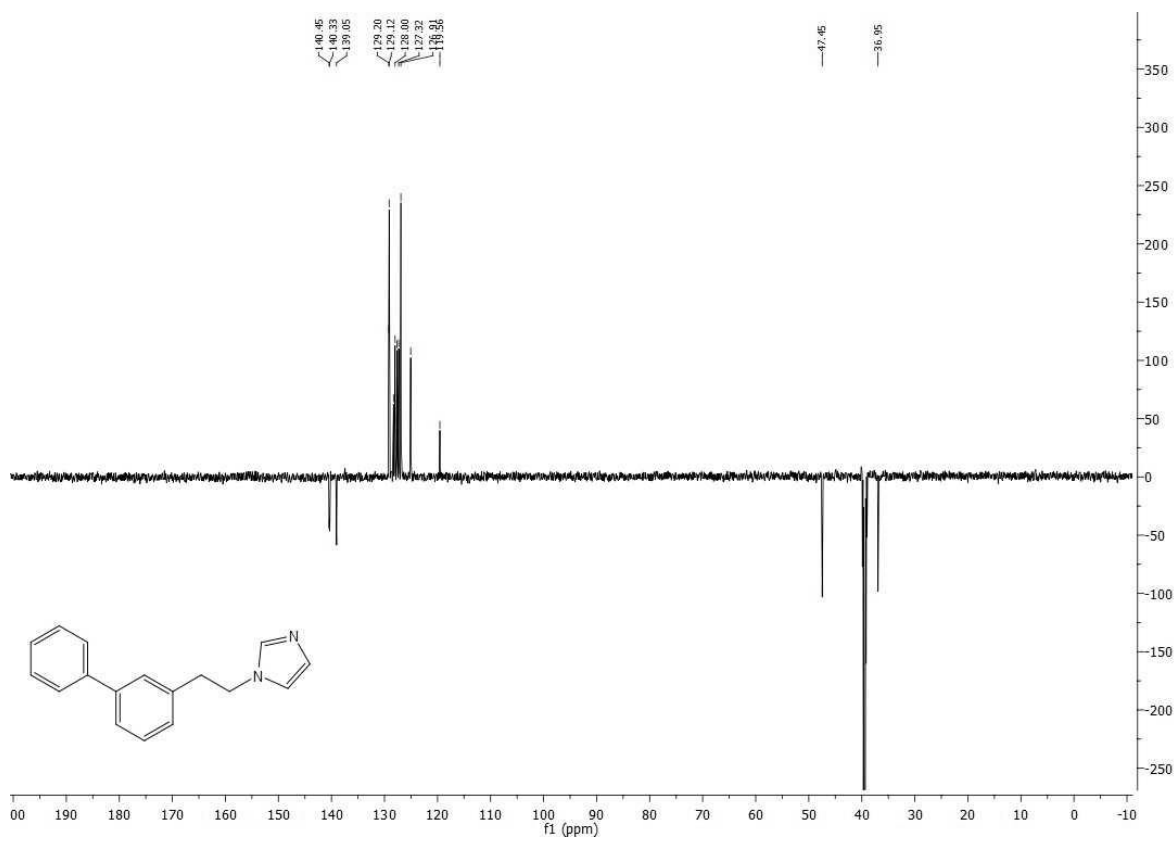Figure S6. <sup>13</sup>C NMR of compound 2c.

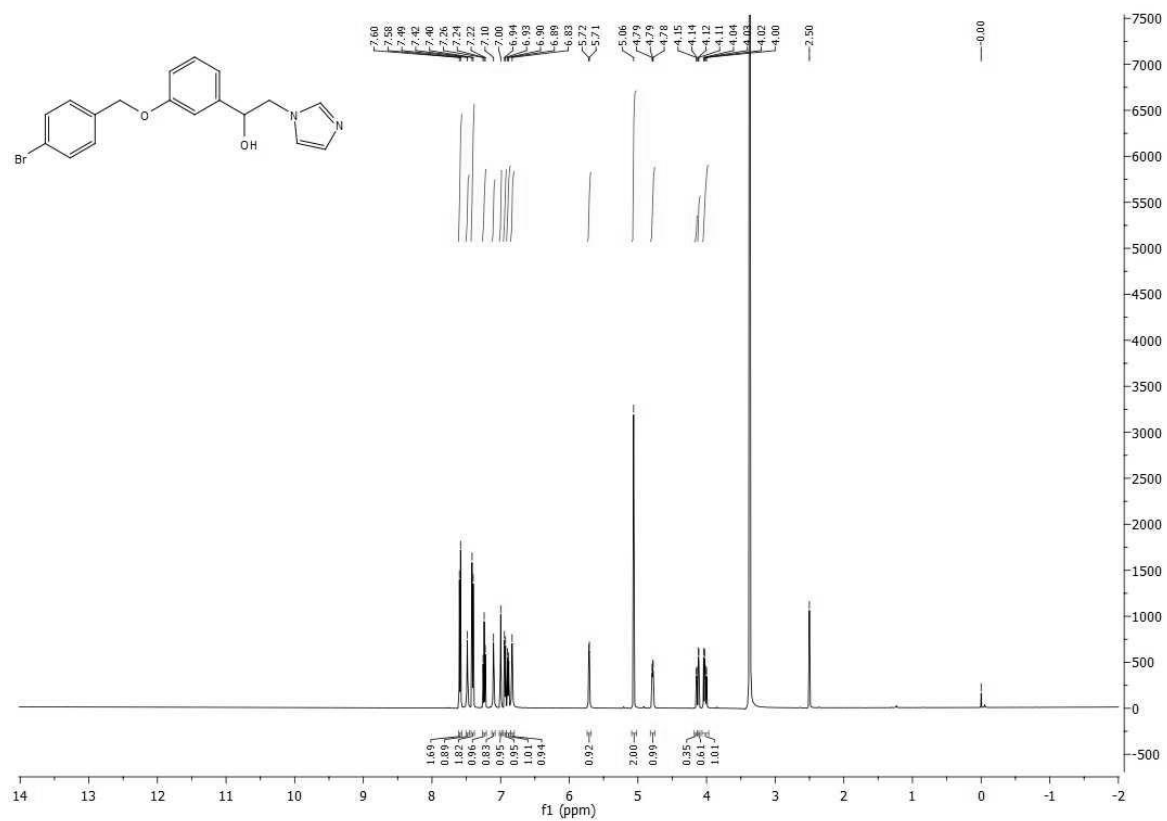Figure S7. <sup>1</sup>H NMR of compound 5a.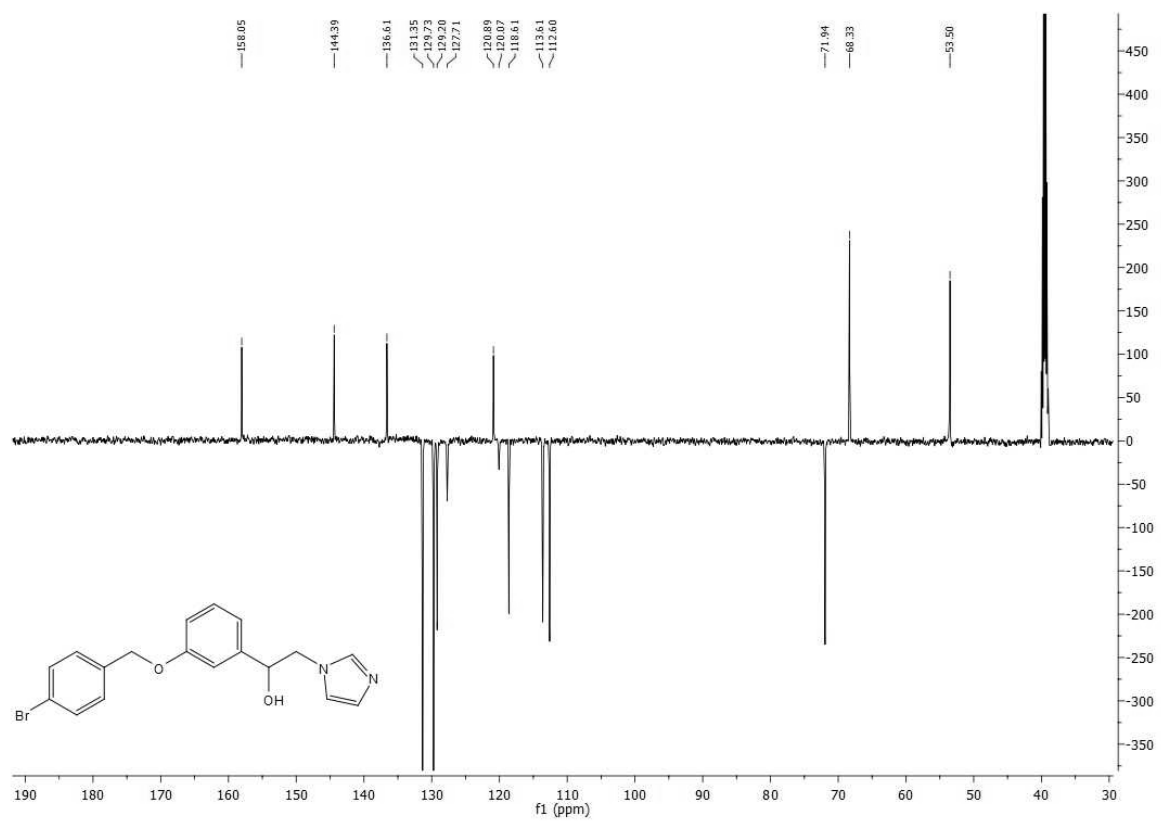Figure S8. <sup>13</sup>C NMR of compound 5a.

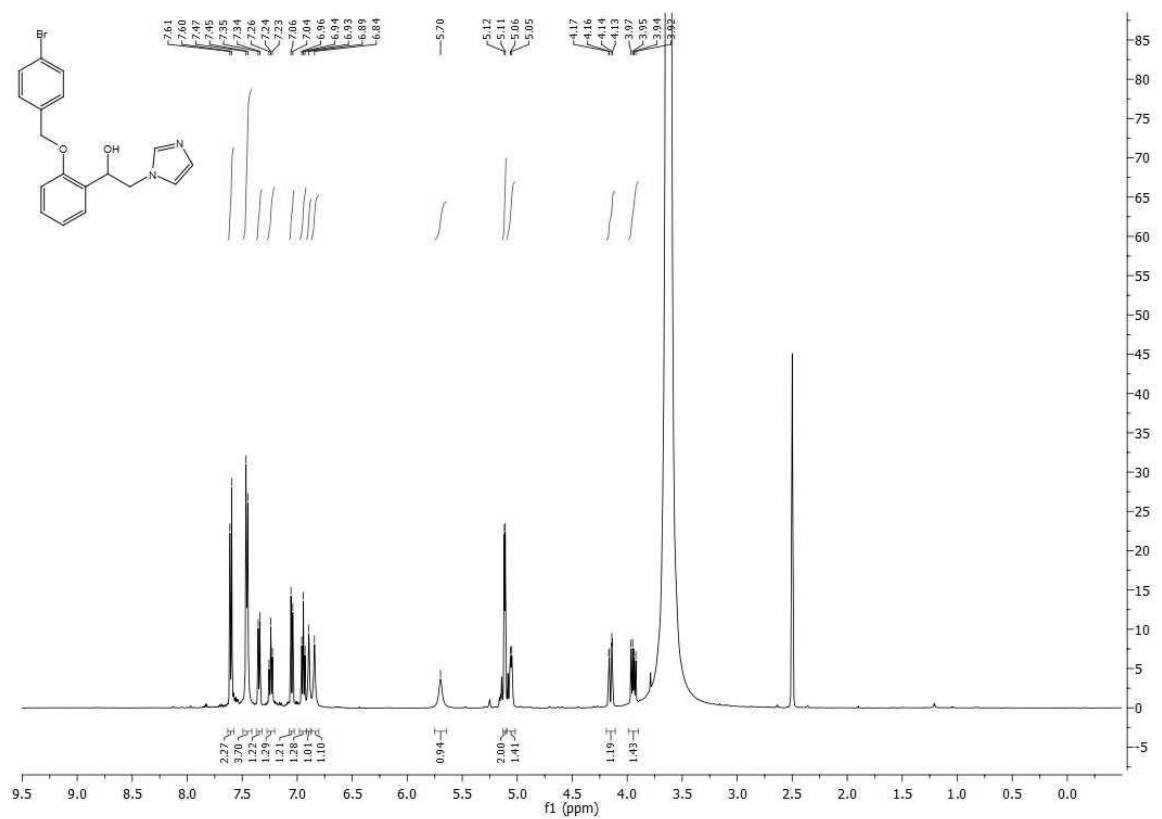Figure S9. <sup>1</sup>H NMR of compound 5b.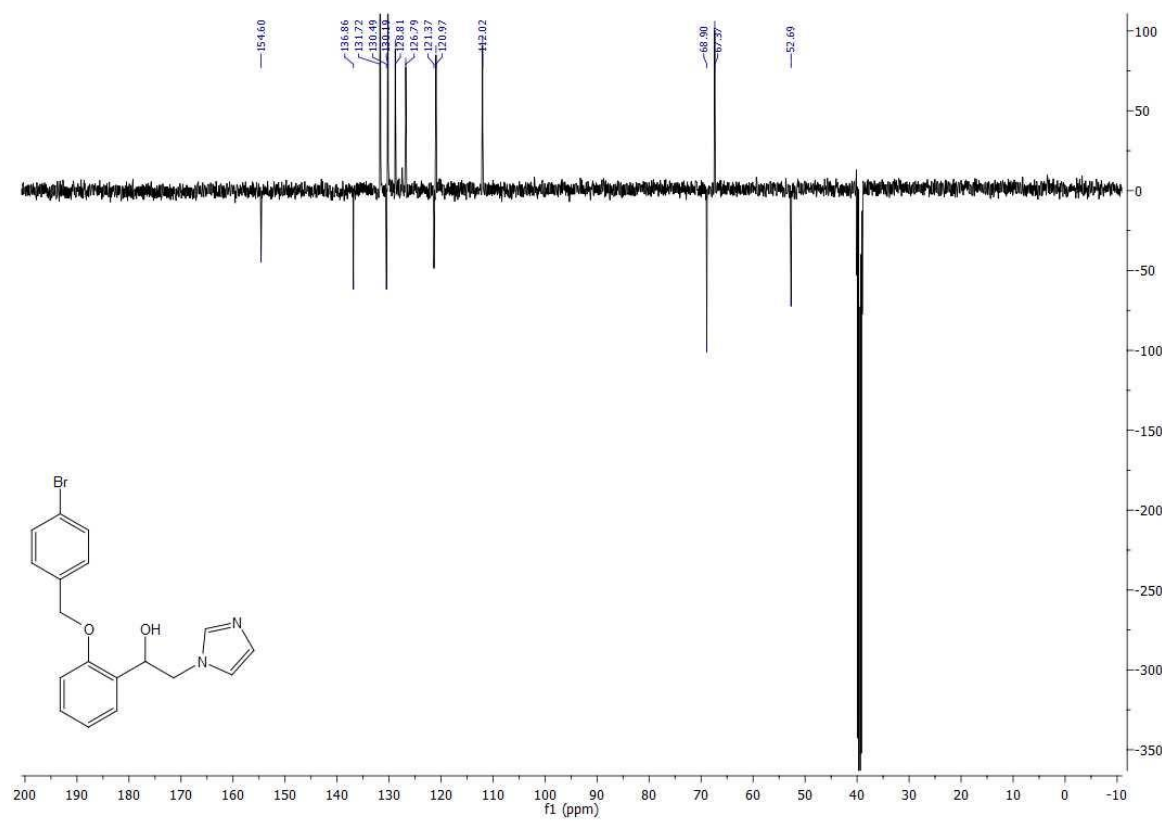Figure S10. <sup>13</sup>C NMR of compound 5b.

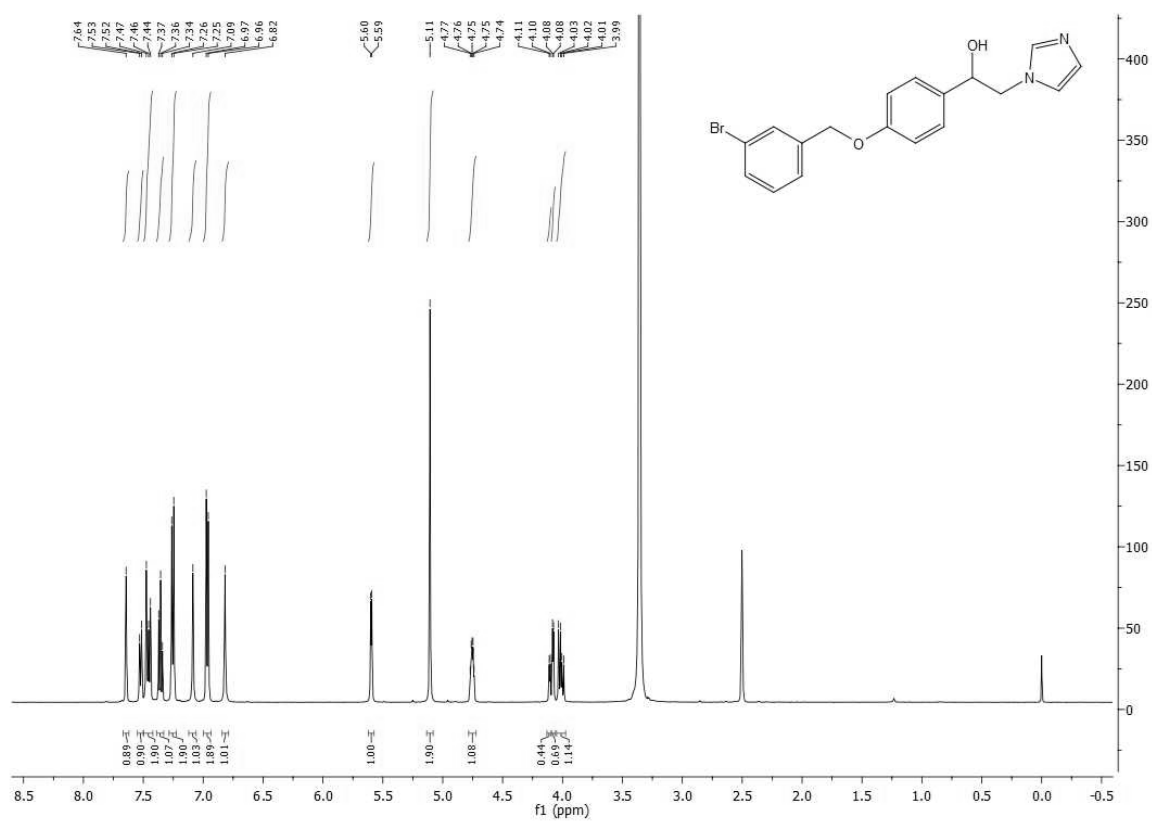Figure S11. <sup>1</sup>H NMR of compound 5c.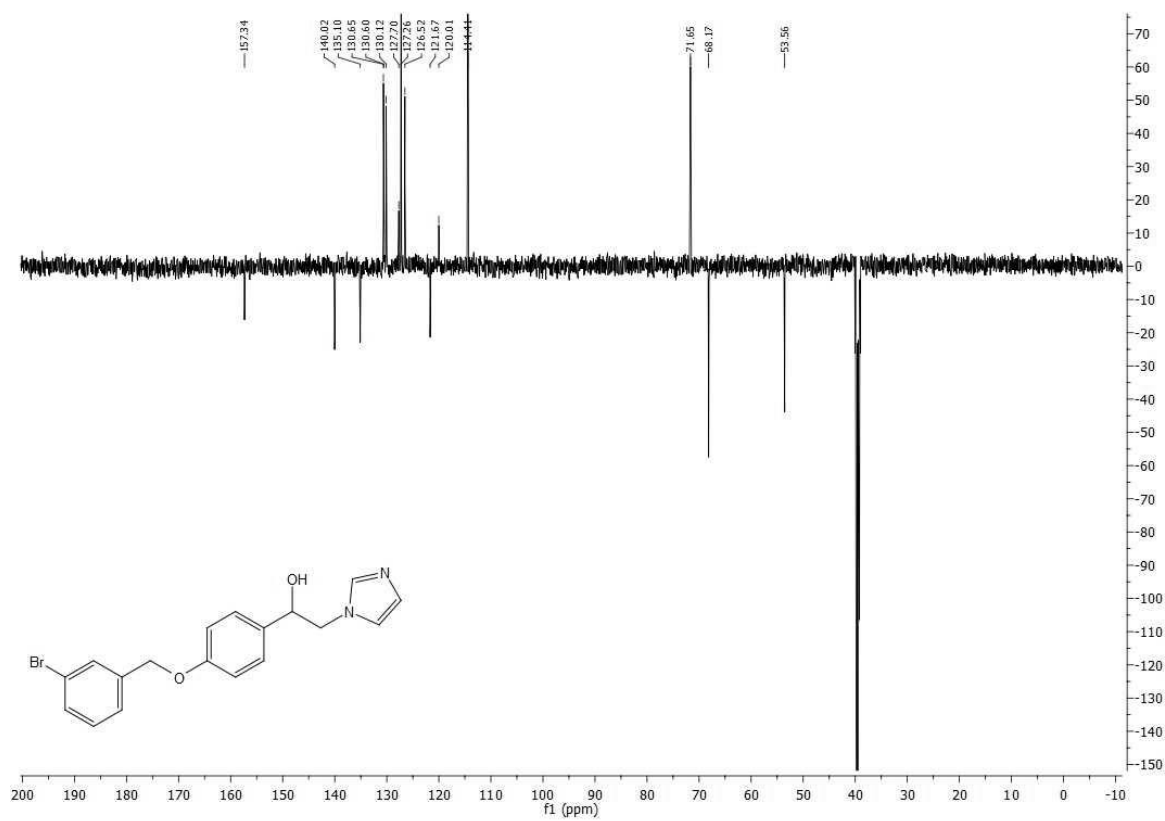Figure S12. <sup>13</sup>C NMR of compound 5c.



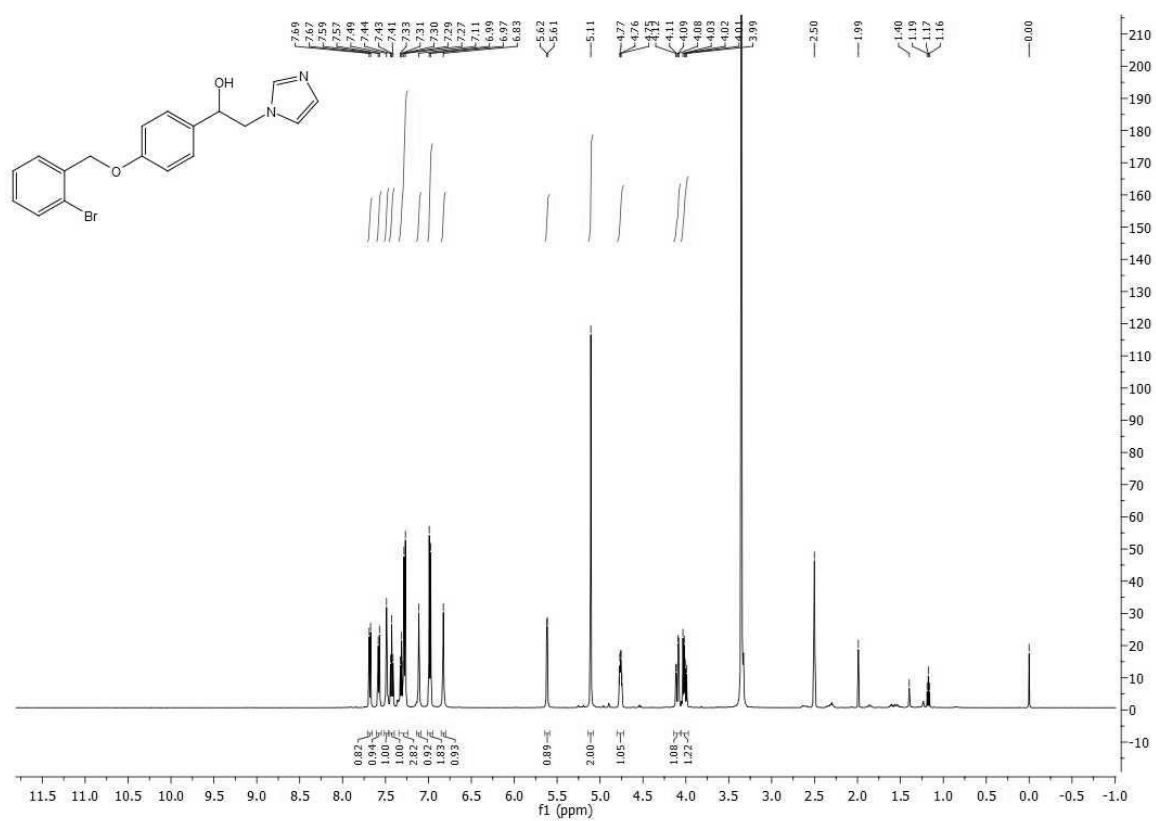Figure S13.  $^1\text{H}$  NMR of compound 5d.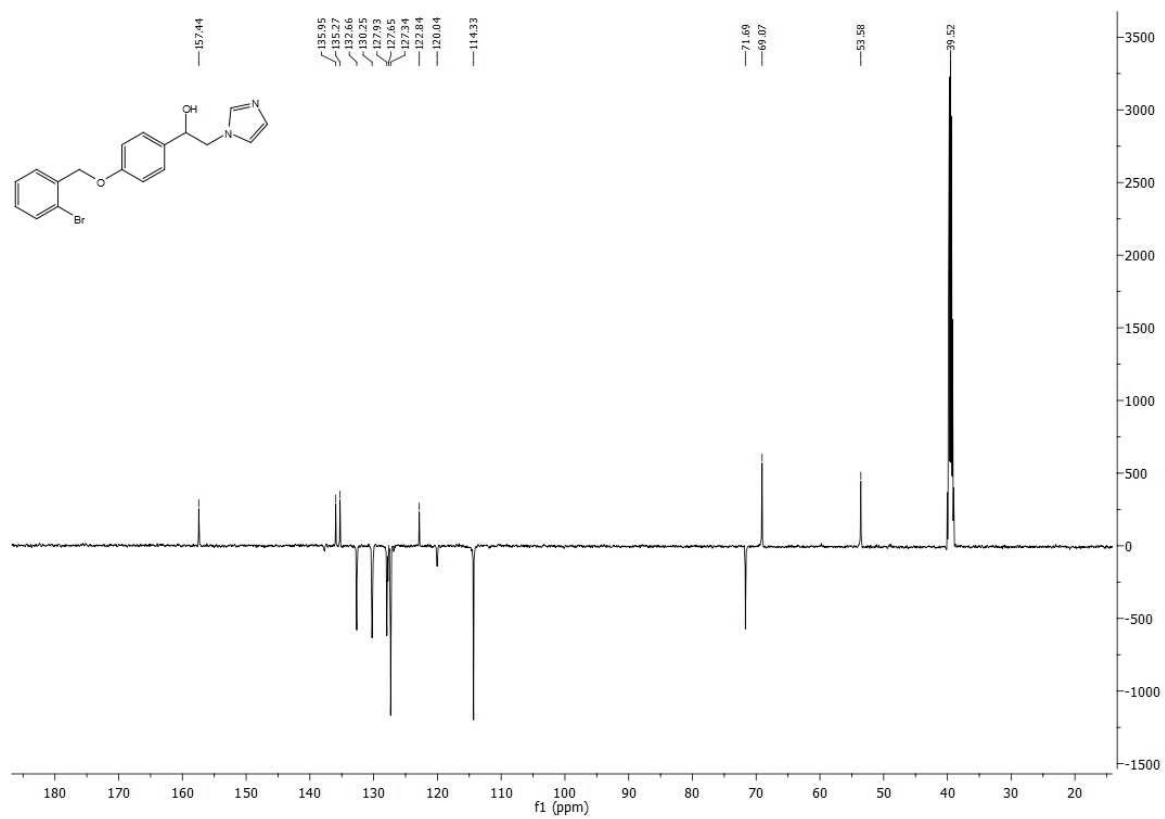Figure S14.  $^{13}\text{C}$  NMR of compound 5d.

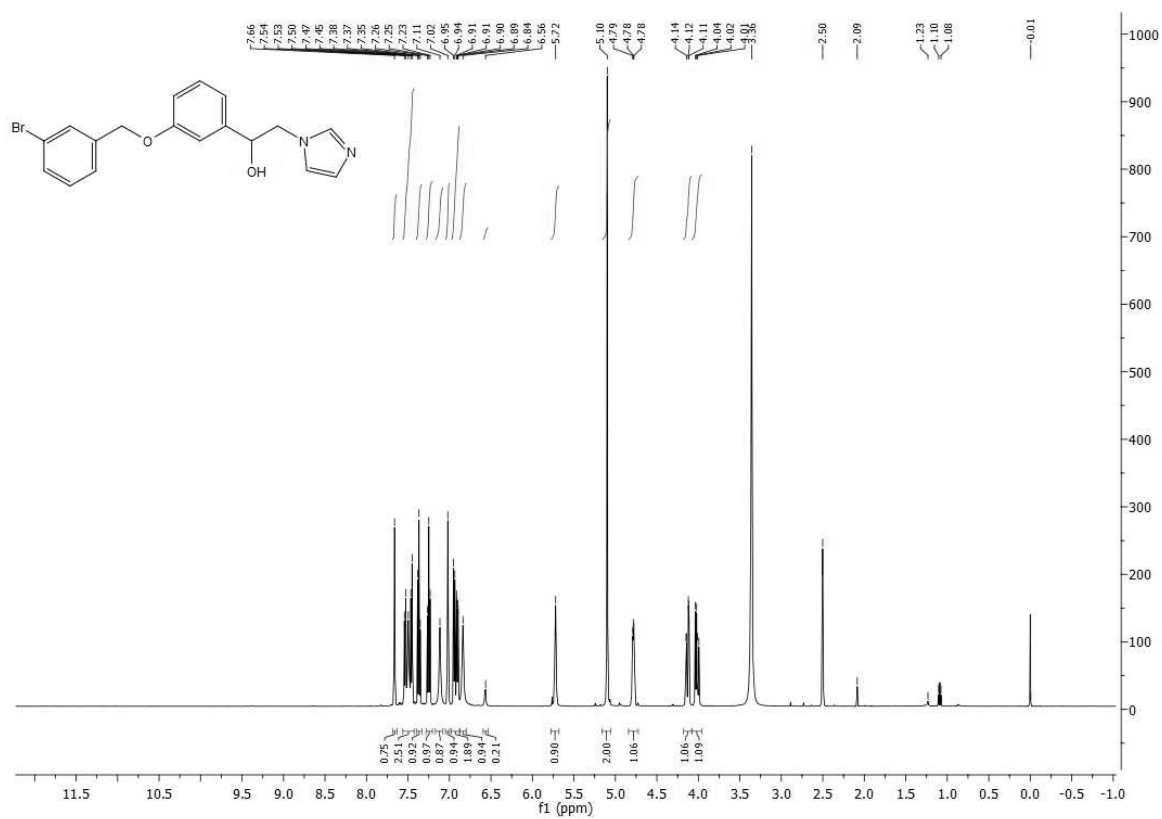Figure S15. <sup>1</sup>H NMR of compound 5e.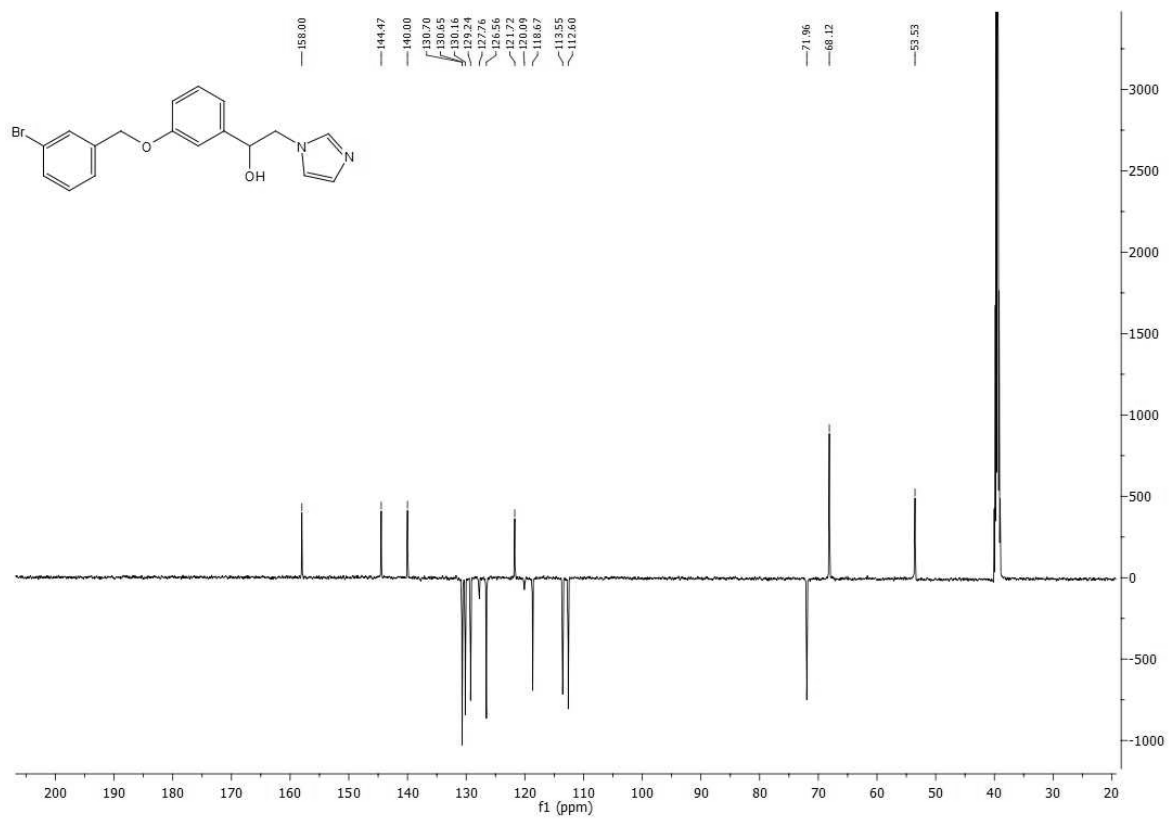Figure S16. <sup>13</sup>C NMR of compound 5e.

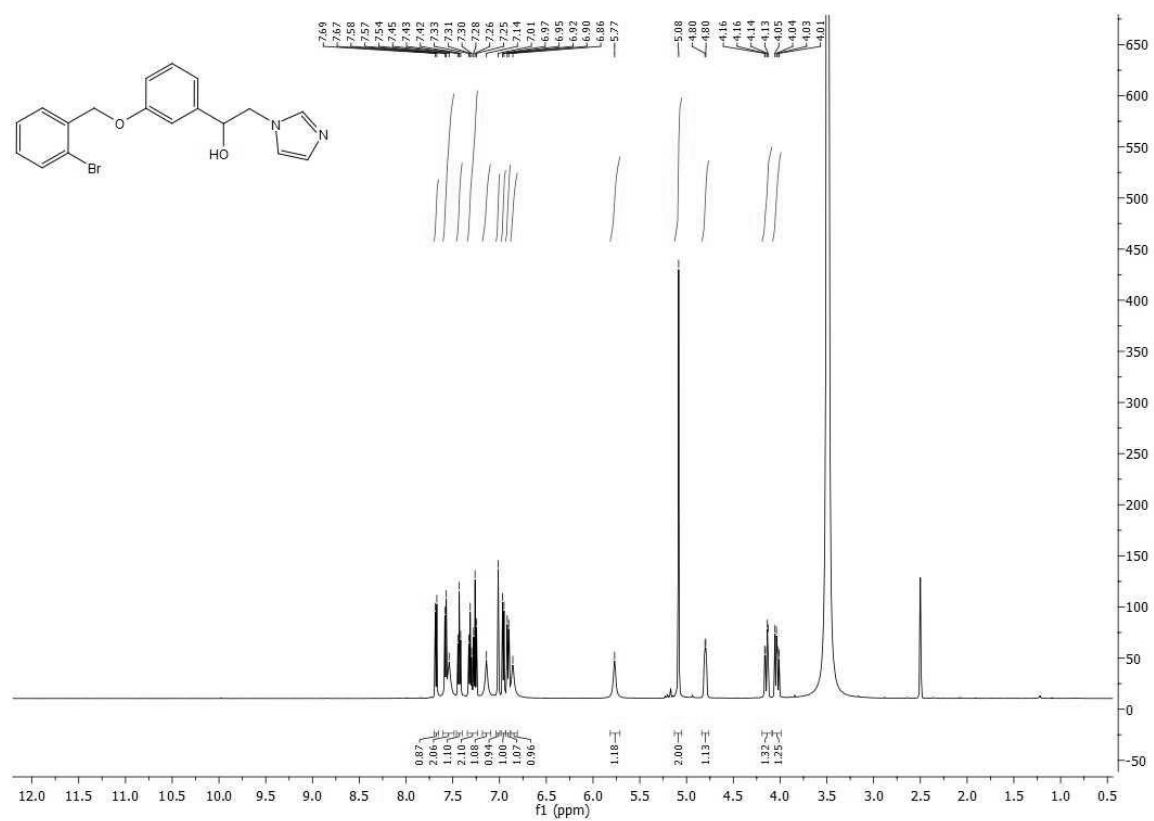Figure S17. <sup>1</sup>H NMR of compound 5f.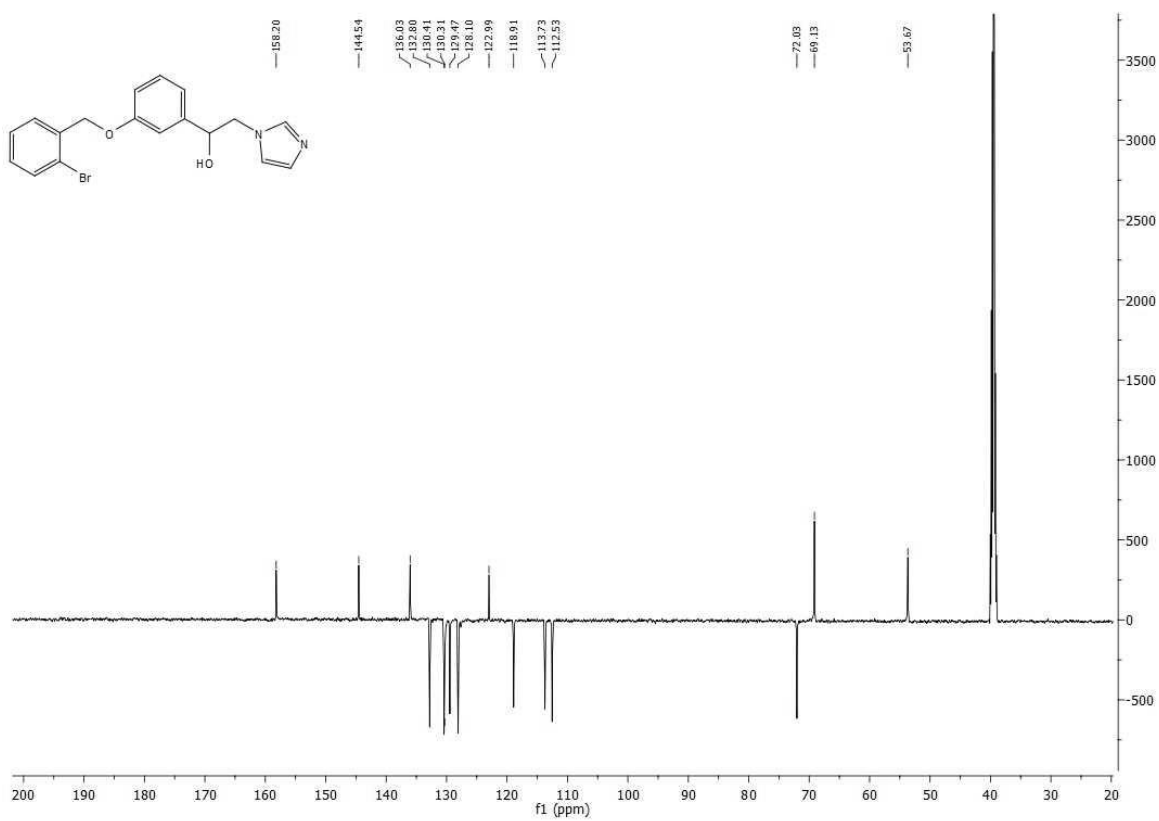Figure S18. <sup>13</sup>C NMR of compound 5f.

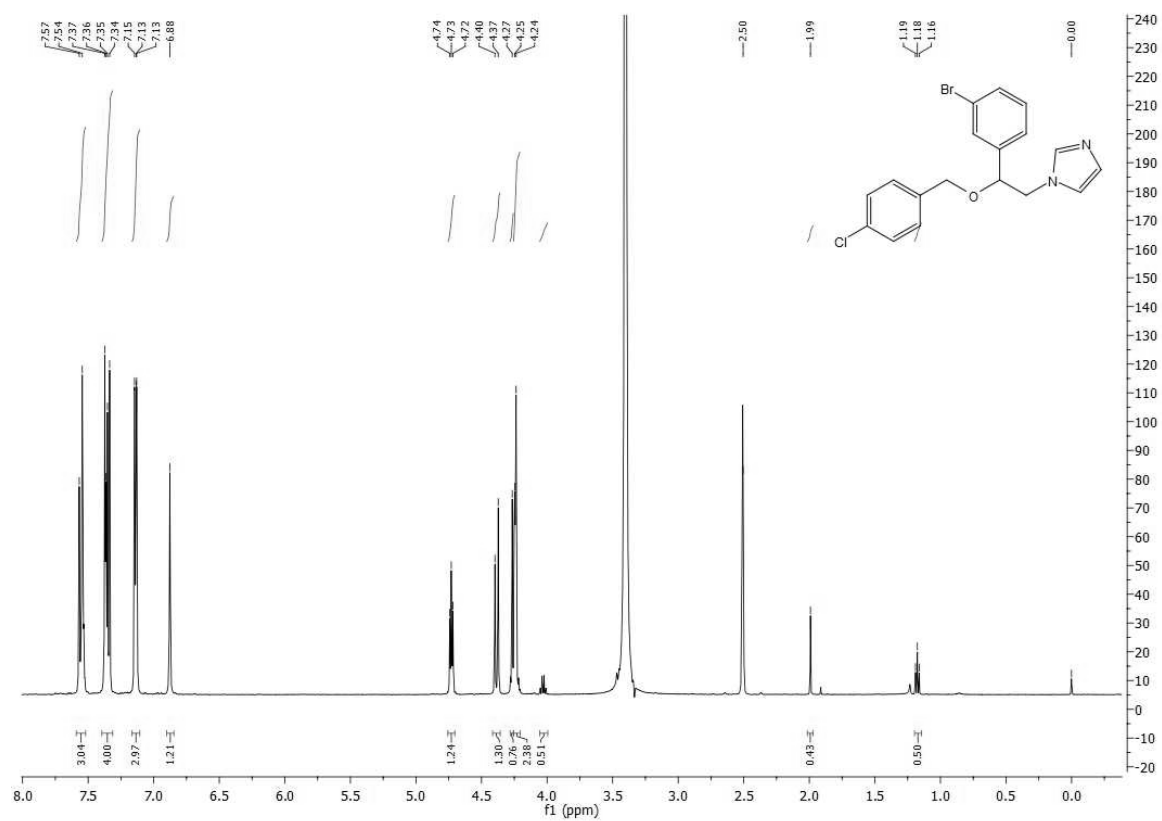Figure S19.  $^1\text{H}$  NMR of compound 6a.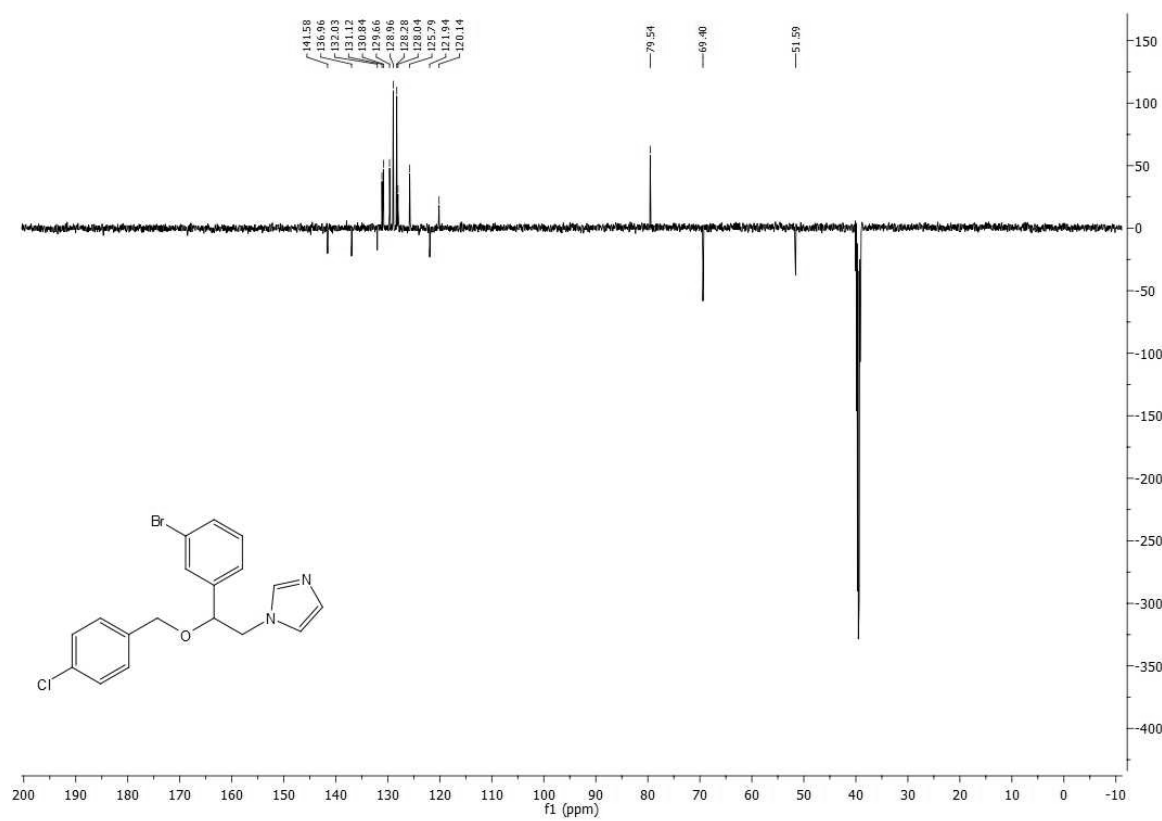Figure S20.  $^{13}\text{C}$  NMR of compound 6a.

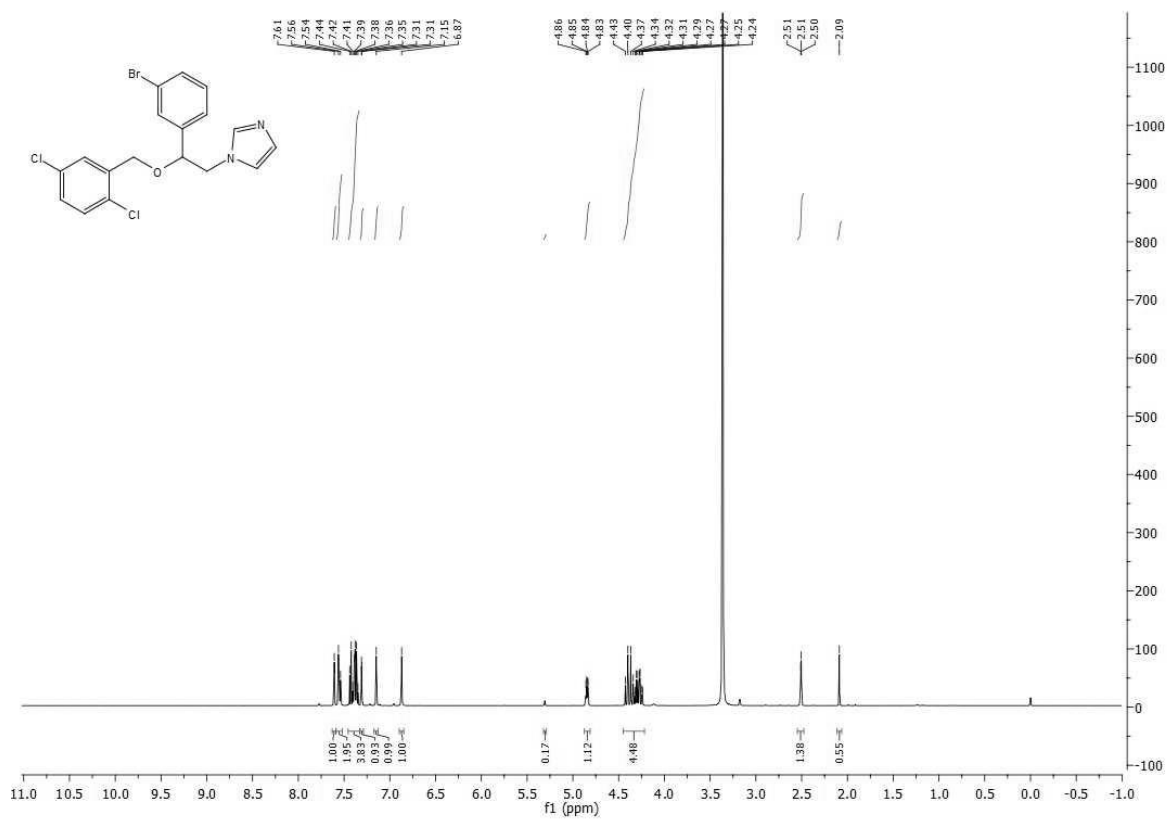Figure S21. <sup>1</sup>H NMR of compound 6b.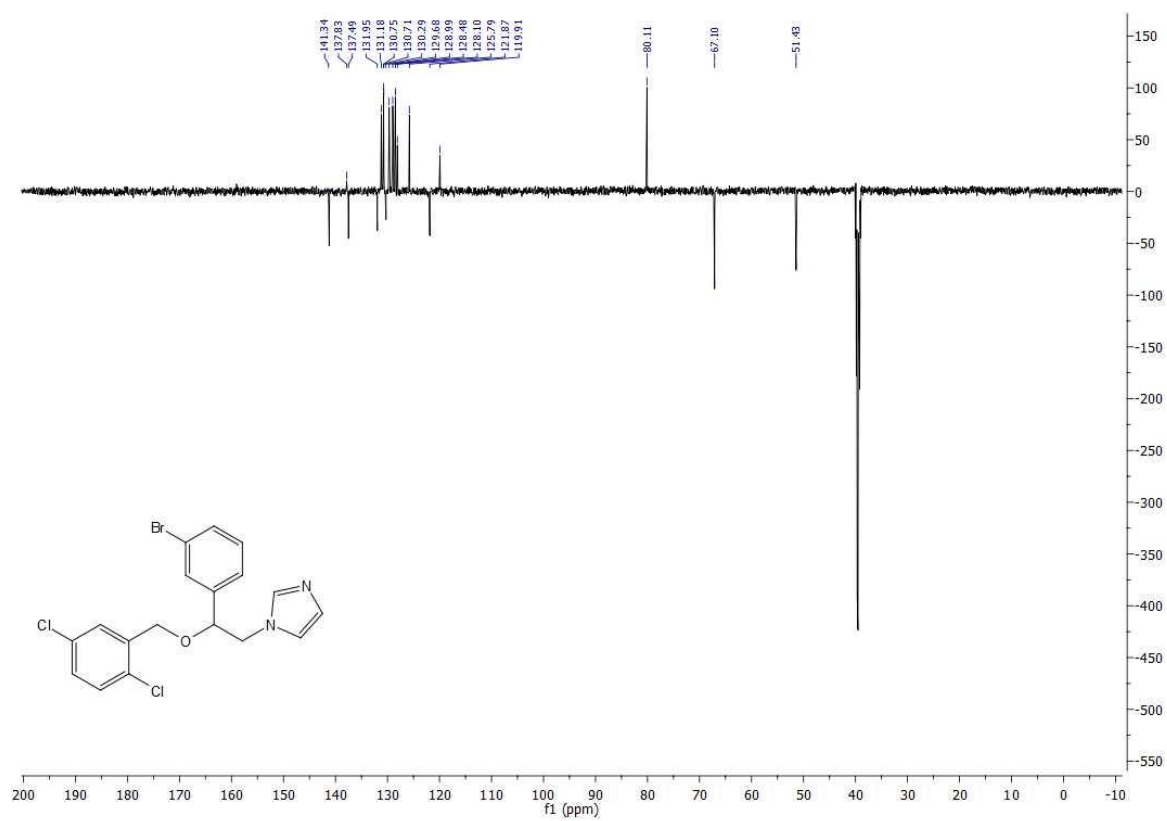Figure S22. <sup>13</sup>C NMR of compound 6b.

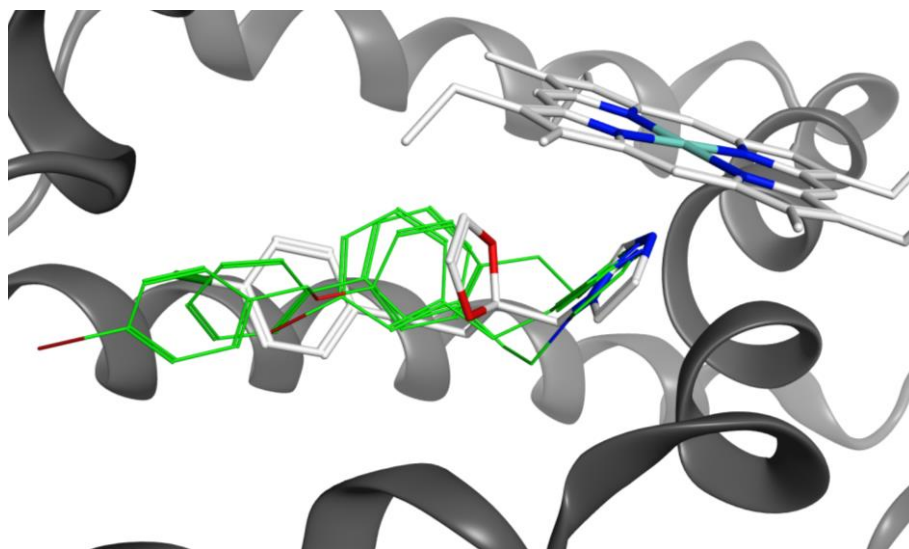

**Figure S23.** Binding poses of molecules **2a–c** (green) compared to the crystallized pose of QC-15 (white).

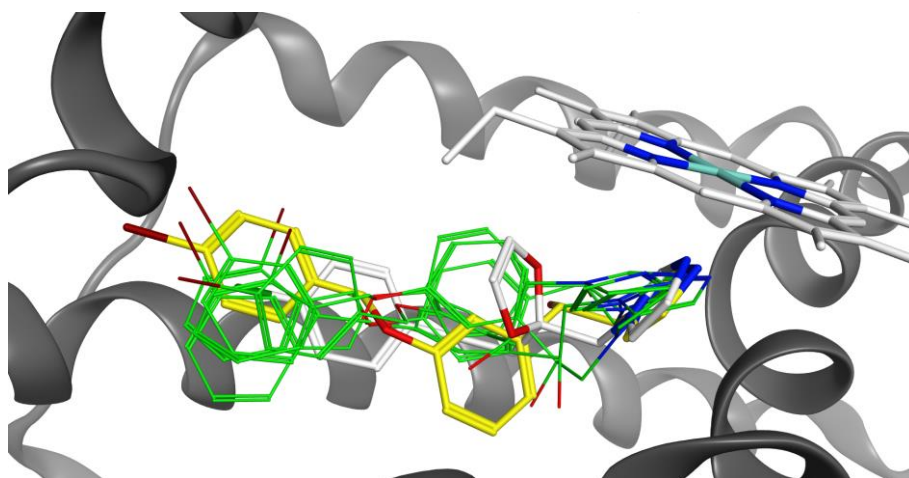

**Figure S24.** Binding poses of molecules **5b–f** (green) compared to the crystallized pose of QC-15 (white). In yellow the binding pose of the most potent compound **5a**.

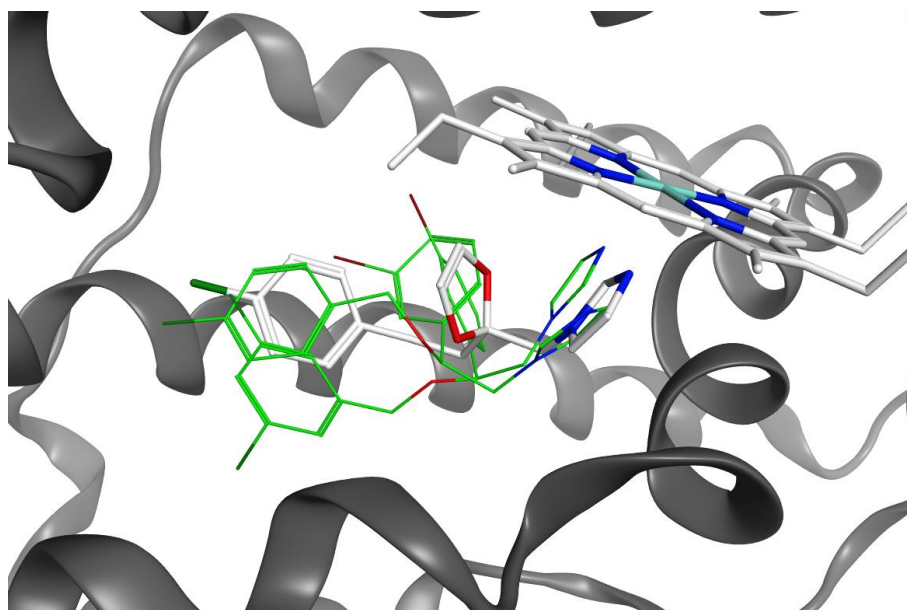

**Figure S25.** Binding poses of molecules **6a, b** (green) compared to the crystallized pose of QC-15 (white).

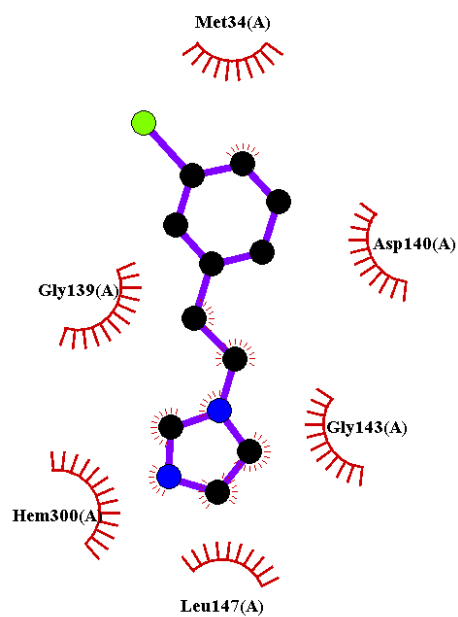

**Figure S26.** 2D representations of HO-1-molecule **2a** complex.

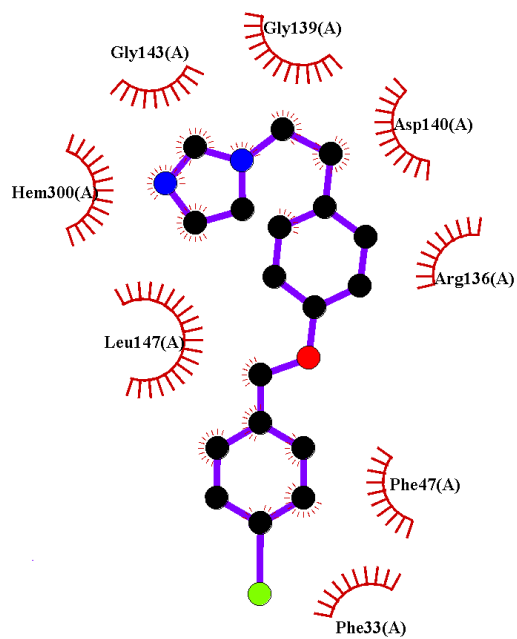

Figure S7. 2D representations of HO-1-molecule **2b** complex.

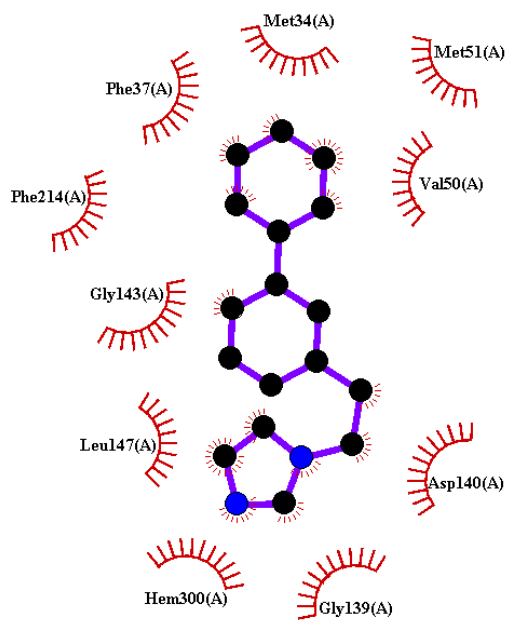

Figure S28. 2D representations of HO-1-molecule **2c** complex.



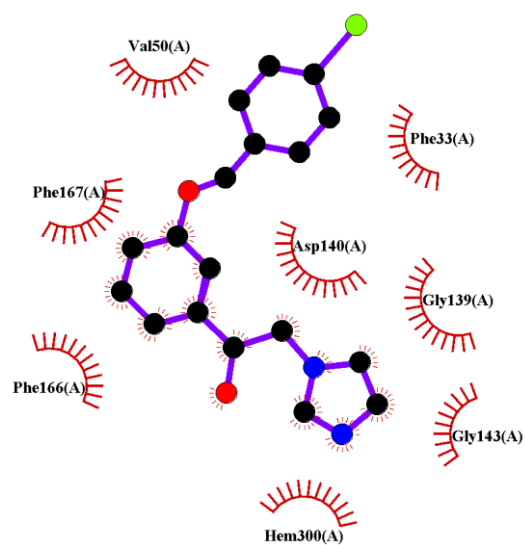

**Figure S29.** 2D representations of HO-1-molecule **5a** complex.

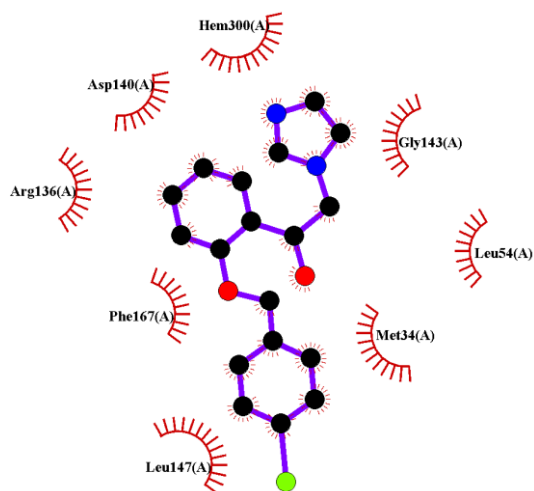

**Figure S30.** 2D representations of HO-1-molecule **5b** complex.

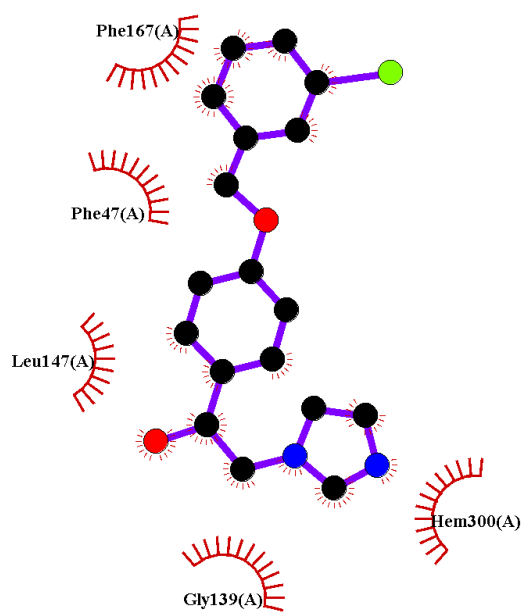

**Figure S31.** 2D representations of HO-1-molecule **5c** complex.

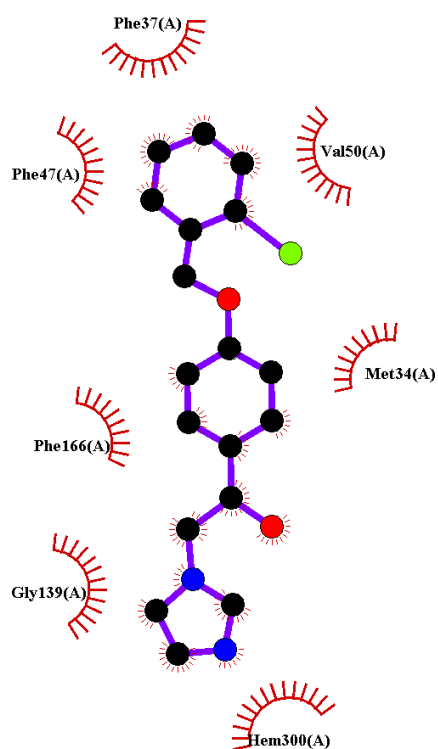

**Figure S32.** 2D representations of HO-1-molecule **5d** complex.

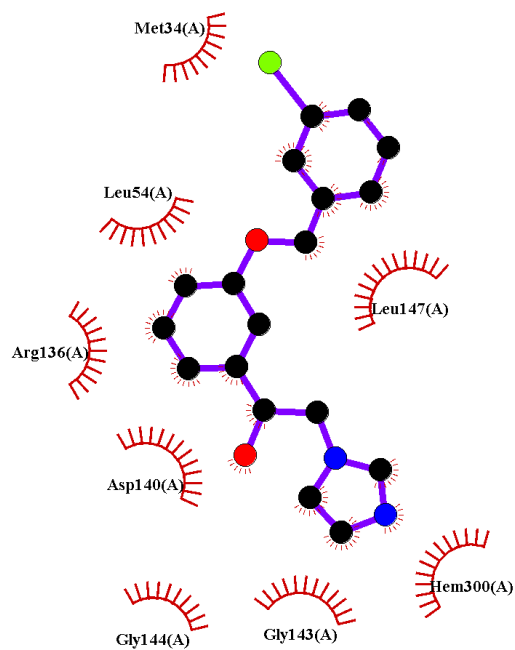

**Figure S33.** 2D representations of HO-1-molecule **5e** complex.

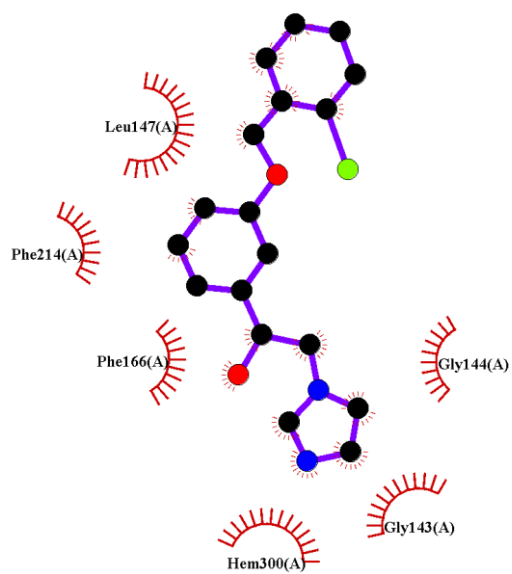

**Figure S34.** 2D representations of HO-1-molecule **5f** complex.

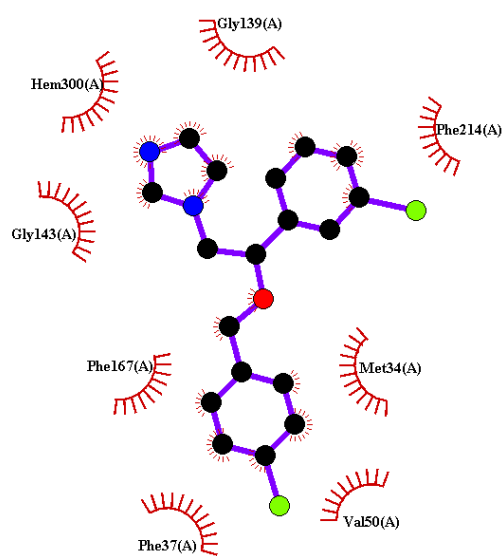

Figure S35. 2D representations of HO-1-molecule 6a complex.

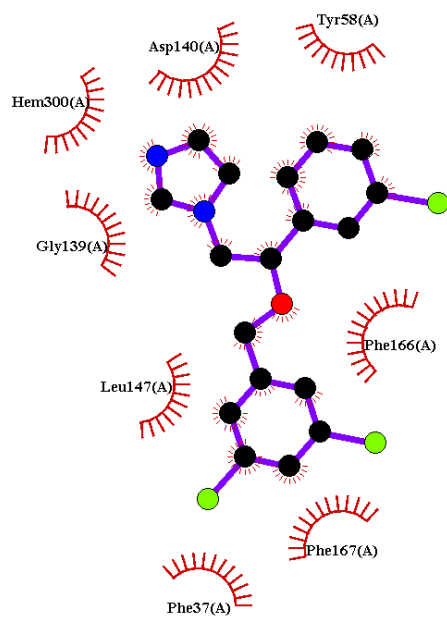

Figure S36. 2D representations of HO-1-molecule 6b complex.
